# Supplementary material
Source: PubMed Central journal article supplement (PMC2842041)
Supplement: 0906386107_pnas.200906386SI.pdf [file 0906386107_pnas.200906386SI.pdf]

# Supporting Information

Elsaesser et al. 10.1073/pnas.0906386107

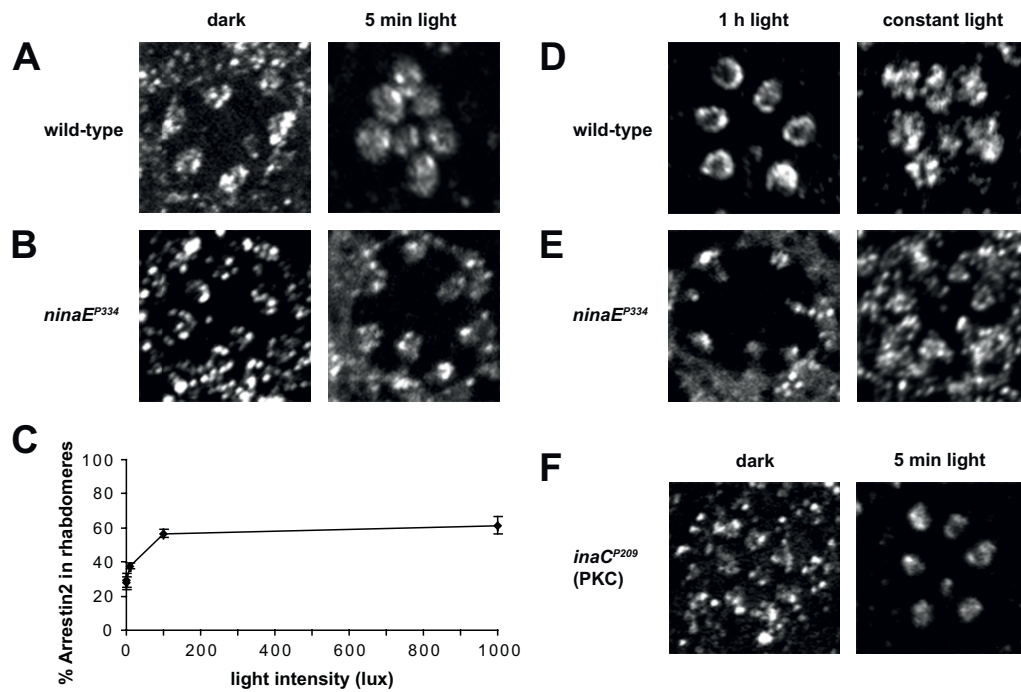

**Fig. S1.** Translocation of Arr2 requires rhodopsin but not protein kinase C. Tangential sections of compound eyes from (A and D) wild-type ( $w^{1118}$ ), (B and E) *ninaE<sup>P334</sup>*, and (F) PKC null mutant (*inaC<sup>P209</sup>*) flies. Flies were dark-adapted for  $\geq 10$  h and subsequently remained in the dark or were exposed to white light for 5 min, 1 h, or  $\geq 12$  h (constant light). (A, B, and D–F) Confocal images of representative ommatidia immunostained with anti-Arr2 antibodies. (C) Quantification of Arr2 staining in the rhabdomeres of wild-type flies exposed to different light intensities based on examination of 11–12 ommatidia each. Error bars represent SEM.

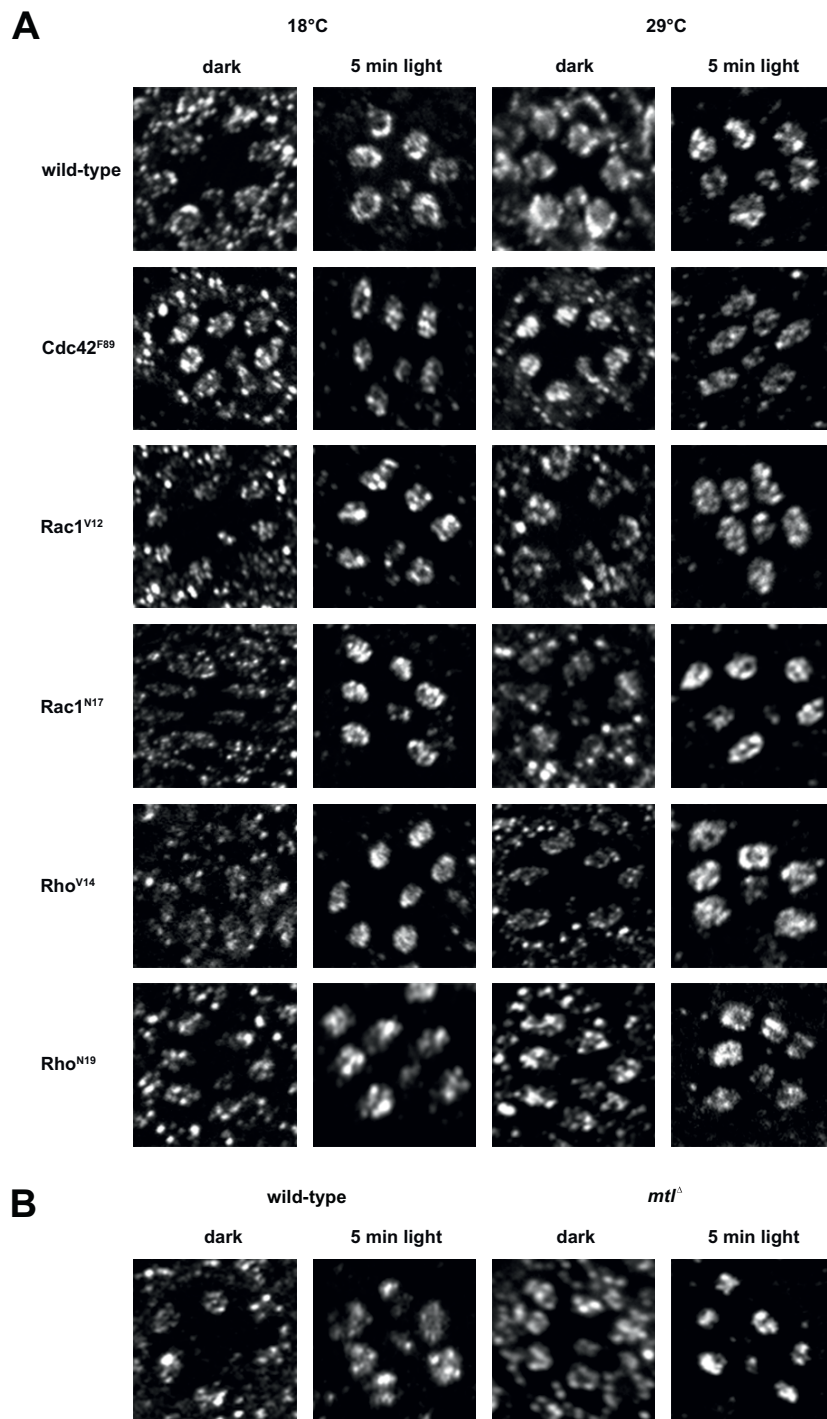

**Fig. S2.** Cdc42, Rac1, Rho, and Mig2-like are not involved in light-induced Arr2 translocation. Tangential sections of the distal (R7) part of the compound eye were obtained from flies of the indicated genotypes, immunostained with anti-Arr2 antibodies, and viewed by confocal microscopy. (A) The TARGET gene expression system (1) was used in combination with *GMR-GAL4* and a temperature-sensitive GAL80 expressed under the control of the *tubulin* promoter (*tub-GAL80<sup>ts</sup>*). We efficiently blocked activation of *GAL4* transcription by maintaining the flies at the permissive temperature (18 °C) for GAL80<sup>ts</sup>. When the flies are kept at the nonpermissive temperature (29 °C) for GAL80<sup>ts</sup>, *GAL4* initiated transcription of *UAS* transgenes. The flies ( $\leq 3$  days old) were reared under a 12-h light/12-h dark cycle at 18 °C. Flies were shifted to 29 °C for 72 h to induce expression of the constitutively active or dominant-negative small GTPases. Control flies were kept at 18 °C. Before the experiment, the flies were dark-adapted for  $\geq 10$  h and subsequently either exposed to white light for 5 min or maintained in the dark. (B) Localization of Arr2 in sections obtained from wild-type and genetically mosaic flies in which the eyes were composed exclusively of *mtl<sup>A</sup>* cells.

1. McGuire SE, Mao Z, Davis RL (2004) Spatiotemporal gene expression targeting with the TARGET and gene-switch systems in *Drosophila*. *Sci STKE* 2004:pl6.
